# Supplementary material
Source: publisher site journal article supplement (https://www.dovepress.com/article/411748)
Supplement: Supplementary file 1 [file get_supplementary_file.php]

**Supplementary Materials**

1. **Table. S1. The independent factors of overall survival by SIPTW-weighted Cox regression analysis**
2. **Table. S2. The independent factors of progression free survival by SIPTW-weighted Cox regression analysis**
3. **Table. S3. Grade 3 and more treatment-related adverse events, treatment modification, and discontinuation before and after SIPTW adjustment**
4. **Table. S4. Any grade treatment-related adverse events before and after the SIPTW adjustment**
5. **Supplementary Figure Legend**

**Figure. S1. The flow chart of patient enrollment.**

**Figure. S2. Overall survival of the combination therapy and monotherapy groups based on Child-Pugh A and B 7 scores.**

**Figure. S2** Overall survival of the combination therapy and monotherapy groups based on Child-Pugh A and B 7 scores. (**A**) Overall survival of the combination therapy and monotherapy (lenvatini plus 3 cycles anti-PD-1) in patients with Child-Pugh A and (**B**) Child-Pugh B 7 scores. (**C**) Overall survival of the combination therapy and monotherapy (lenvatini plus 4 cycles anti-PD-1) in patients with Child-Pugh A and (**D**) Child-Pugh B 7 scores.

**Table. S1. The independent factors of overall survival by SIPTW-weighted Cox regression analysis**

| **Characteristics** | **Univariate** | | **Multivariate** | |
| --- | --- | --- | --- | --- |
| **HR (95CI)** | **P-value** | **HR (95CI)** | **P-value** |
| **Duration of lenvatinib (≥7.6 *vs.* <7.6) months** | 0.27(0.18-0.41) | <0.001 | 0.28(0.18-0.43) | <0.001 |
| **Combination therapy（Yes *vs.* No)** | 0.58(0.38-0.89) | 0.014 | 0.44(0.27-0.72) | 0.001 |
| **Extrahepatic spread (Yes *vs.* No)** | 2.14(1.43-3.21) | <0.001 | 1.69(1.01-2.85) | 0.046 |
| **Child-pugh (B *vs.* A)** | 2.08(1.45-2.99) | <0.001 | 1.48(0.95-2.3) | 0.081 |
| **No vascular invasion (Reference)** | 1 |  | 1 |  |
| Trunk invasion | 2.60(1.62-4.18) | <0.001 | 1.7(0.93-3.09) | 0.083 |
| Branch invasion | 1.64(1.08-2.50) | 0.020 | 1.29(0.76-2.18) | 0.344 |
| **HBV DNA (Positive *vs.* Negative)** | 1.49(1.02-2.17) | 0.039 | 1.23(0.8-1.88) | 0.344 |
| **ALBI grade (1 *vs.* 2 or 3)** | 1.66(0.95-2.90) | 0.076 | 1.22(0.67-2.23) | 0.508 |
| **Maximum tumor diameter (cm)** | 1.04(1.00-1.07) | 0.052 | 1.01(0.97-1.05) | 0.693 |
| **BCLC stage (C *vs.* B)** | 1.97(1.22-3.19) | 0.006 | 0.91(0.47-1.74) | 0.769 |
| **Previous targeted therapy (Yes *vs.* No)** | 1.46(0.96-2.21) | 0.074 | 1.06(0.66-1.7) | 0.803 |
| **ALP (U/L)** | 1(1-1.01) | 0.003 | 1(1-1) | 0.850 |
| **GGT (U/L)** | 1(1-1) | 0.002 | 1(1-1) | 0.911 |
| **Number of tumor lesions (Multiple *vs.* Single)** | 1.43(0.93-2.21) | 0.101 |  |  |
| **PT (s)** | 1.11(0.96-1.29) | 0.158 |  |  |
| **ECOG-PS (2 *vs.* 0 or 1)** | 2.25(0.70-7.15) | 0.171 |  |  |
| **Tumor occupation (≥50% *vs.* <50%）** | 1.30(0.87-1.95) | 0.207 |  |  |
| **ALT (U/L)** | 1(0.99-1) | 0.217 |  |  |
| **Sex (Male *vs.* Female)** | 1.39(0.78-2.47) | 0.267 |  |  |
| **Liver cirrhosis (Yes *vs.* No)** | 1.39(0.70-2.74) | 0.347 |  |  |
| **HCV infected (Yes *vs.* No)** | 0.61(0.20-1.83) | 0.377 |  |  |
| **HBV infected (Yes *vs*. No)** | 0.78(0.46-1.35) | 0.379 |  |  |
| **AFP (≥400 *vs.* <400) ng/ml** | 1.17(0.82-1.68) | 0.393 |  |  |
| **Bodyweight (kg)** | 0.99(0.98-1.01) | 0.441 |  |  |
| **Hypertension (Yes *vs.* No)** | 0.87(0.56-1.33) | 0.511 |  |  |
| **Lenvatinib 8W-RDI (%)** | 1(0.99-1.01) | 0.547 |  |  |
| **AST (U/L)** | 1(1-1) | 0.565 |  |  |
| **Previous radiotherapy (Yes *vs.* No)** | 0.92(0.63-1.34) | 0.657 |  |  |
| **Antivirus therapy (Yes *vs.* No)** | 0.91(0.59-1.41) | 0.683 |  |  |
| **Age (years)** | 1(0.98-1.02) | 0.817 |  |  |
| **Diabetes (Yes *vs.* No)** | 1.04(0.71-1.54) | 0.825 |  |  |
| **PLT (10^9/L)** | 1(1-1) | 0.864 |  |  |
| **Previous TACE (Yes *vs.* No)** | 0.99(0.68-1.43) | 0.94 |  |  |

*ALBI grade: Albumin-Bilirubin Grade; BCLC stage: Barcelona Clinic Liver Cancer; ALP: Alkaline phosphatase; GGT: γ-glutamyl transpeptidase; PT: Prothrombin time; ECOG-PS: Eastern Cooperative Oncology Group Performance Status; ALT: Aspartate aminotransferas; AFP: α-fetoprotein; AST: Aspartate aminotransferase; PLT: Blood platelet; TACE: Transcatheter arterial chemoembolization*

**Table. S2. The independent factors of progression free survival by SIPTW-weighted Cox regression analysis**

| **Characteristics** | **Univariate** | | **Multivariate** | |
| --- | --- | --- | --- | --- |
| **HR (95CI)** | **P-value** | **HR (95CI)** | **P-value** |
| **Duration of lenvatinib (≥7.6 *vs.* <7.6) months** | 0.35 (0.25-0.51) | ＜0.001 | 0.33 (0.23-0.49) | ＜0.001 |
| **Combination therapy（Yes vs. No)** | 0.63 (0.43-0.92) | 0.016 | 0.65 (0.46-0.92) | 0.014 |
| **Previous radiotherapy (Yes vs. No)** | 0.70 (0.50-0.97) | 0.035 | 0.67 (0.47-0.96) | 0.027 |
| **HBV DNA (Positive vs. Negative)** | 1.35 (0.98-1.88) | 0.068 | 1.27 (0.88-1.82) | 0.200 |
| **ALP (U/L)** | 1 (1-1) | 0.020 | 1 (1-1) | 0.306 |
| **Extrahepatic spread (Yes vs. No)** | 1.39 (1.02-1.89) | 0.036 | 1.21 (0.84-1.73) | 0.310 |
| **Maximum tumor diameter (cm)** | 1.04 (1.01-1.08) | 0.005 | 1.02 (0.98-1.05) | 0.394 |
| **Child-pugh (B vs. A)** | 1.59 (1.16-2.16) | 0.004 | 1.16 (0.81-1.67) | 0.406 |
| **No vascular invasion** **(Reference)** | 1 |  | 1 |  |
| Trunk invasion | 1.63 (1.08-2.45) | 0.019 | 1.08 (0.64-1.83) | 0.759 |
| Branch invasion | 1.42 (1-2.01) | 0.048 | 1.13 (0.73-1.76) | 0.572 |
| **Number of tumor lesions (Multiple vs. Single)** | 1.39 (0.97-1.98) | 0.075 | 1.11 (0.76-1.64) | 0.582 |
| **AST (U/L)** | 1 (1-1) | 0.083 | 1 (1-1) | 0.731 |
| **BCLC stage (C vs. B)** | 1.40 (0.97-2.02) | 0.073 | 1.04 (0.61-1.78) | 0.886 |
| **GGT (U/L)** | 1 (1-1) | 0.006 | 1 (1-1) | 0.967 |
| **Tumor occupation (≥50% vs. ＜50%）** | 1.27 (0.90-1.79) | 0.176 |  |  |
| **ALT (U/L)** | 1 (1-1.01) | 0.194 |  |  |
| **Sex (Male vs. Female)** | 1.34 (0.83-2.16) | 0.235 |  |  |
| **PT (s)** | 1.07 (0.95-1.20) | 0.282 |  |  |
| **Bodyweight (kg)** | 0.99 (0.98-1.01) | 0.333 |  |  |
| **Previous TACE (Yes vs. No)** | 1.15 (0.84-1.58) | 0.381 |  |  |
| **Previous targeted therapy (Yes vs. No)** | 0.91 (0.63-1.33) | 0.626 |  |  |
| **AFP (≥ 400 vs. ＜400) ng/ml** | 1.06 (0.79-1.44) | 0.686 |  |  |
| **ECOG-PS (2 vs. 0 or 1)** | 1.19 (0.49-2.90) | 0.702 |  |  |
| **HBV infected (Yes vs. No)** | 1.05 (0.65-1.70) | 0.831 |  |  |
| **Antivirus therapy (Yes vs. No)** | 1.04 (0.71-1.52) | 0.837 |  |  |
| **Liver cirrhosis (Yes vs. No)** | 0.95 (0.58-1.58) | 0.856 |  |  |
| **Age (years)** | 1 (0.98-1.01) | 0.857 |  |  |
| **Diabetes (Yes vs. No)** | 0.97 (0.70-1.35) | 0.879 |  |  |
| **ALBI grade (1 vs. 2 or 3)** | 1.02 (0.66-1.57) | 0.928 |  |  |
| **Lenvatinib 8W-RDI (%)** | 1 (0.99-1.01) | 0.939 |  |  |
| **HCV infected (Yes vs. No)** | 1.03 (0.43-2.47) | 0.943 |  |  |
| **PLT (10^9/L)** | 1 (1-1) | 0.966 |  |  |

*ALP: Alkaline phosphatase；AST: Aspartate aminotransferase; BCLC stage: Barcelona Clinic Liver Cancer; GGT: γ-glutamyl transpeptidase; ALT: Aspartate aminotransferas; PT: Prothrombin time; TACE: Transcatheter arterial chemoembolization; AFP: α-fetoprotein; ECOG-PS: Eastern Cooperative Oncology Group Performance Status; ALBI grade: Albumin-Bilirubin Grade; PLT: Blood platelet*

**Table. S3. Grade 3 and more treatment-related adverse events, treatment modification, and discontinuation before and after SIPTW adjustment**

|  | **ALL patients (n=210)** | **Unweighted study population** | | | | **Weighted study population after sIPTW** | | | |
| --- | --- | --- | --- | --- | --- | --- | --- | --- | --- |
| **Monotherapy (n=140)** | **Combination  (n=70)** | **P-Value** | **SMD value** | **Monotherapy (n=140.13)** | **Combination  (n=69.68)** | **P-Value** | **SMD value** |
| Any adverse event | 111(52.9%) | 69 (49.3%) | 42 (60.0%) | 0.143 | 0.237 | 71.9 (51.3%) | 38.2 (54.8%) | 0.634 | 0.052 |
| Hypertension | 39(18.6%) | 26 (18.6%) | 13 (18.6%) | 1 | <0.001 | 26.2 (18.7%) | 13.5 (19.4%) | 0.907 | 0.023 |
| Fatigue | 7(3.3%) | 4 (2.9%) | 3 (4.3%) | 0.892 | 0.014 | 4.4 (3.1%) | 2.5 (3.6%) | 1 | <0.001 |
| Diarrhea | 8(3.8%) | 5 (3.6%) | 3 (4.3%) | 1 | <0.001 | 5.3 (3.8%) | 2.6 (3.7%) | 1 | <0.001 |
| Elevated AST | 10(4.8%) | 6 (4.3%) | 4 (5.7%) | 0.734 | 0.049 | 6.9 (4.9%) | 3.5 (5.0%) | 1 | <0.001 |
| Hyperbilirubinemia | 8(3.8%) | 4 (2.9%) | 4 (5.7%) | 0.445 | 0.122 | 4.7 (3.4%) | 2.9 (4.2%) | 1 | <0.001 |
| Bodyweight decrease | 6(2.9%) | 3 (2.1%) | 3 (4.3%) | 0.403 | 0.132 | 3.8 (2.7%) | 2.7 (3.9%) | 0.688 | 0.132 |
| Thrombocytopenia | 12(5.7%) | 8 (5.7%) | 4 (5.7%) | 1 | <0.001 | 8.2 (5.9%) | 4.3 (6.2%) | 1 | <0.001 |
| Elevated ALT | 8(3.8%) | 5 (3.6%) | 3 (4.3%) | 1 | <0.001 | 4.9 (3.5%) | 3.1 (4.4%) | 1 | <0.001 |
| Proteinuria | 11(5.2%) | 7 (5.0%) | 4 (5.7%) | 1 | <0.001 | 6.8 (4.9%) | 4.2 (6.0%) | 1 | <0.001 |
| Hypothyroidism | 2(1.0%) | 1 (0.7%) | 1 (1.4%) | 1 | <0.001 | 1.0 (0.7%) | 1.1 (1.6%) | 1 | <0.001 |
| Adverse events leading to interruption and/or dose reduction | 90(42.9%) | 57 (40.7%) | 33 (47.1%) | 0.375 | 0.157 | 57.9 (41.3%) | 33.1 (47.5%) | 0.396 | 0.151 |
| Adverse events leading to treatment-related discontinuation | 21(10%) | 12 (8.6%) | 9 (12.9%) | 0.329 | 0.162 | 11.3 (8.1%) | 8.5 (12.2%) | 0.335 | 0.171 |

Note: treatment-related AEs with frequents ≥ 1% are presented

**Table. S4. Any grade treatment-related adverse events before and after the SIPTW adjustment**

|  | **ALL patients (n=210)** | **Unweighted study population** | | | | **Weighted study population after sIPTW** | | | |
| --- | --- | --- | --- | --- | --- | --- | --- | --- | --- |
| **Monotherapy (n=140)** | **Combination  (n=70)** | **P-Value** | **SMD value** | **Monotherapy (n=140.13)** | **Combination  (n=69.68)** | **P-Value** | **SMD value** |
| **Any adverse event** | 205(97.6%) | 135 (96.4%) | 70 (100.0%) | 0.263 | 0.272 | 135.8 (96.9%) | 69.7 (100.0%) | 0.116 | 0.252 |
| **Hypertension** | 88(41.9%) | 57 (40.7%) | 31 (44.3%) | 0.729 | 0.072 | 58.5 (41.7%) | 33.6 (48.2%) | 0.421 | 0.129 |
| **Fatigue** | 87(41.4%) | 58 (41.4%) | 29 (41.4%) | 1 | <0.001 | 57.6 (41.1%) | 30.3 (43.5%) | 0.768 | 0.048 |
| **Decreased appetite** | 81(38.6%) | 55 (39.3%) | 26 (37.1%) | 0.88 | 0.044 | 55.4 (39.5%) | 28.2 (40.5%) | 0.905 | 0.019 |
| **Diarrhea** | 75(35.7%) | 47 (33.6%) | 28 (40.0%) | 0.445 | 0.134 | 47.1 (33.6%) | 24.5 (35.2%) | 0.829 | 0.034 |
| **Hand-foot syndrome** | 73(34.8%) | 45 (32.1%) | 28 (40.0%) | 0.33 | 0.164 | 44.5 (31.8%) | 28.7 (41.2%) | 0.212 | 0.198 |
| **Proteinuria** | 67(31.9%) | 42 (30.0%) | 25 (35.7%) | 0.496 | 0.122 | 41.8 (29.9%) | 25.0 (35.9%) | 0.409 | 0.129 |
| **Bodyweight decrease** | 60(28.6%) | 41 (29.3%) | 19 (27.1%) | 0.871 | 0.048 | 41.7 (29.8%) | 16.6 (23.9%) | 0.39 | 0.134 |
| **Hypothyroidism** | 56(26.7%) | 33 (23.6%) | 23 (32.9%) | 0.204 | 0.207 | 32.6 (23.3%) | 25.4 (36.5%) | 0.071 | 0.292 |
| **Elevated AST** | 41(19.5%) | 26 (18.6%) | 15 (21.4%) | 0.758 | 0.071 | 26.4 (18.9%) | 15.8 (22.7%) | 0.56 | 0.094 |
| **Thrombocytopenia** | 39(18.6%) | 23 (16.4%) | 16 (22.9%) | 0.347 | 0.162 | 24.3 (17.3%) | 14.6 (20.9%) | 0.549 | 0.091 |
| **Elevated ALT** | 34(16.2%) | 20 (14.3%) | 14 (20.0%) | 0.389 | 0.152 | 19.8 (14.2%) | 14.7 (21.1%) | 0.239 | 0.182 |
| **Dysphonia** | 33(15.7%) | 20 (14.3%) | 13 (18.6%) | 0.546 | 0.116 | 20.1 (14.3%) | 13.2 (18.9%) | 0.459 | 0.123 |
| **Hyperbilirubinemia** | 32(15.2%) | 20 (14.3%) | 12 (17.1%) | 0.734 | 0.079 | 20.0 (14.2%) | 16.3 (23.4%) | 0.157 | 0.236 |
| **Nausea** | 27(12.9%) | 15 (10.7%) | 12 (17.1%) | 0.274 | 0.186 | 15.3 (10.9%) | 14.1 (20.3%) | 0.11 | 0.261 |
| **Hyperammonemia** | 27(12.9%) | 15 (10.7%) | 12 (17.1%) | 0.274 | 0.186 | 14.8 (10.6%) | 10.5 (15.1%) | 0.358 | 0.135 |

Note: treatment-related AEs with frequents ≥ 10% are presented


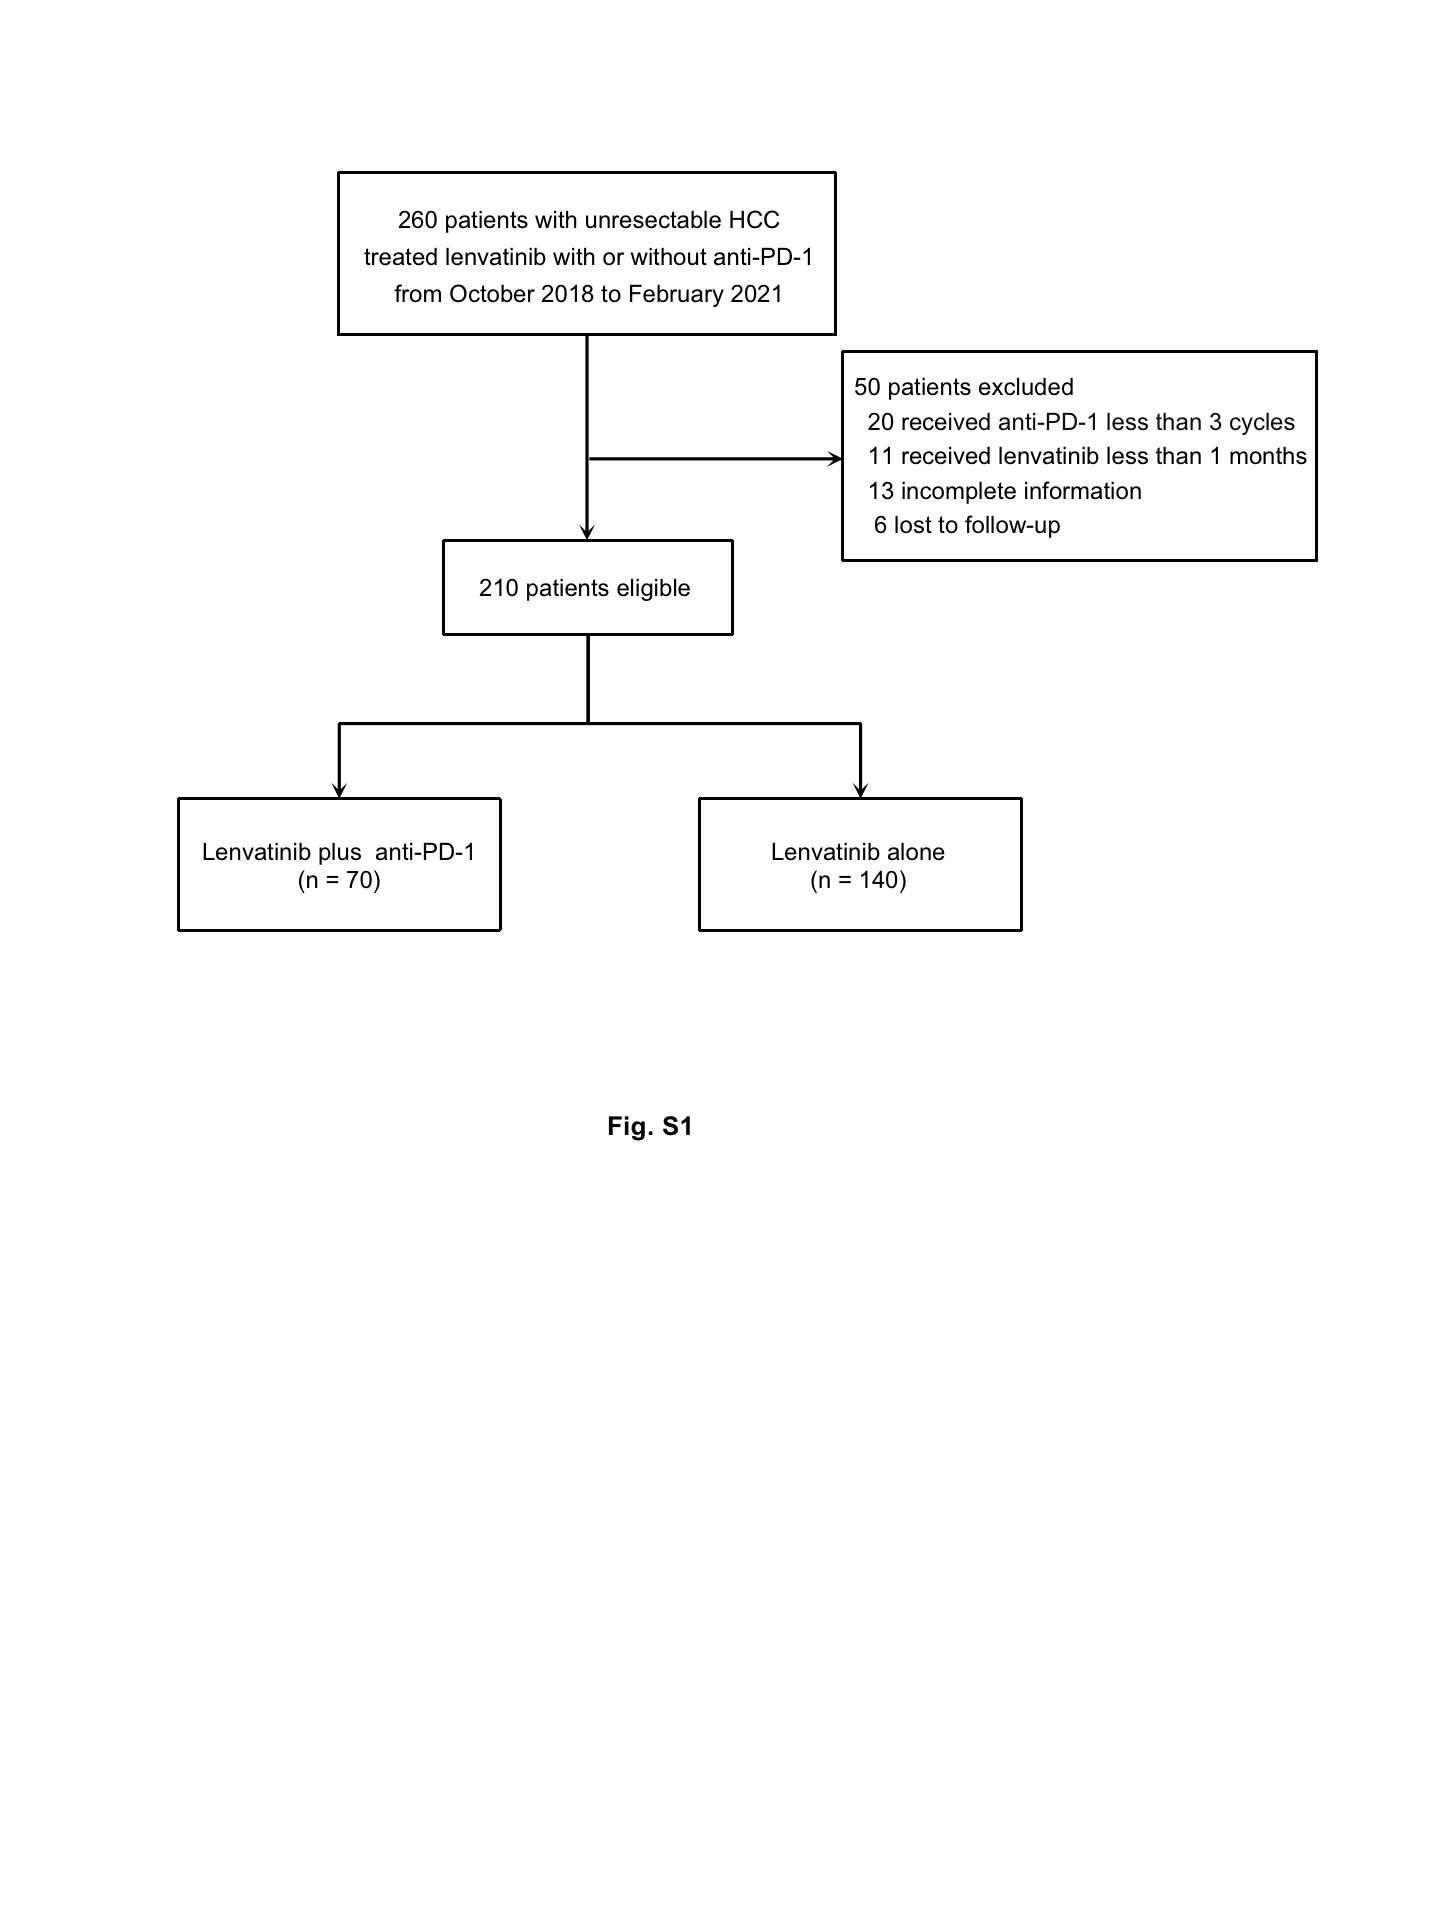


**Figure S1. The flow chart of patient enrollment.**


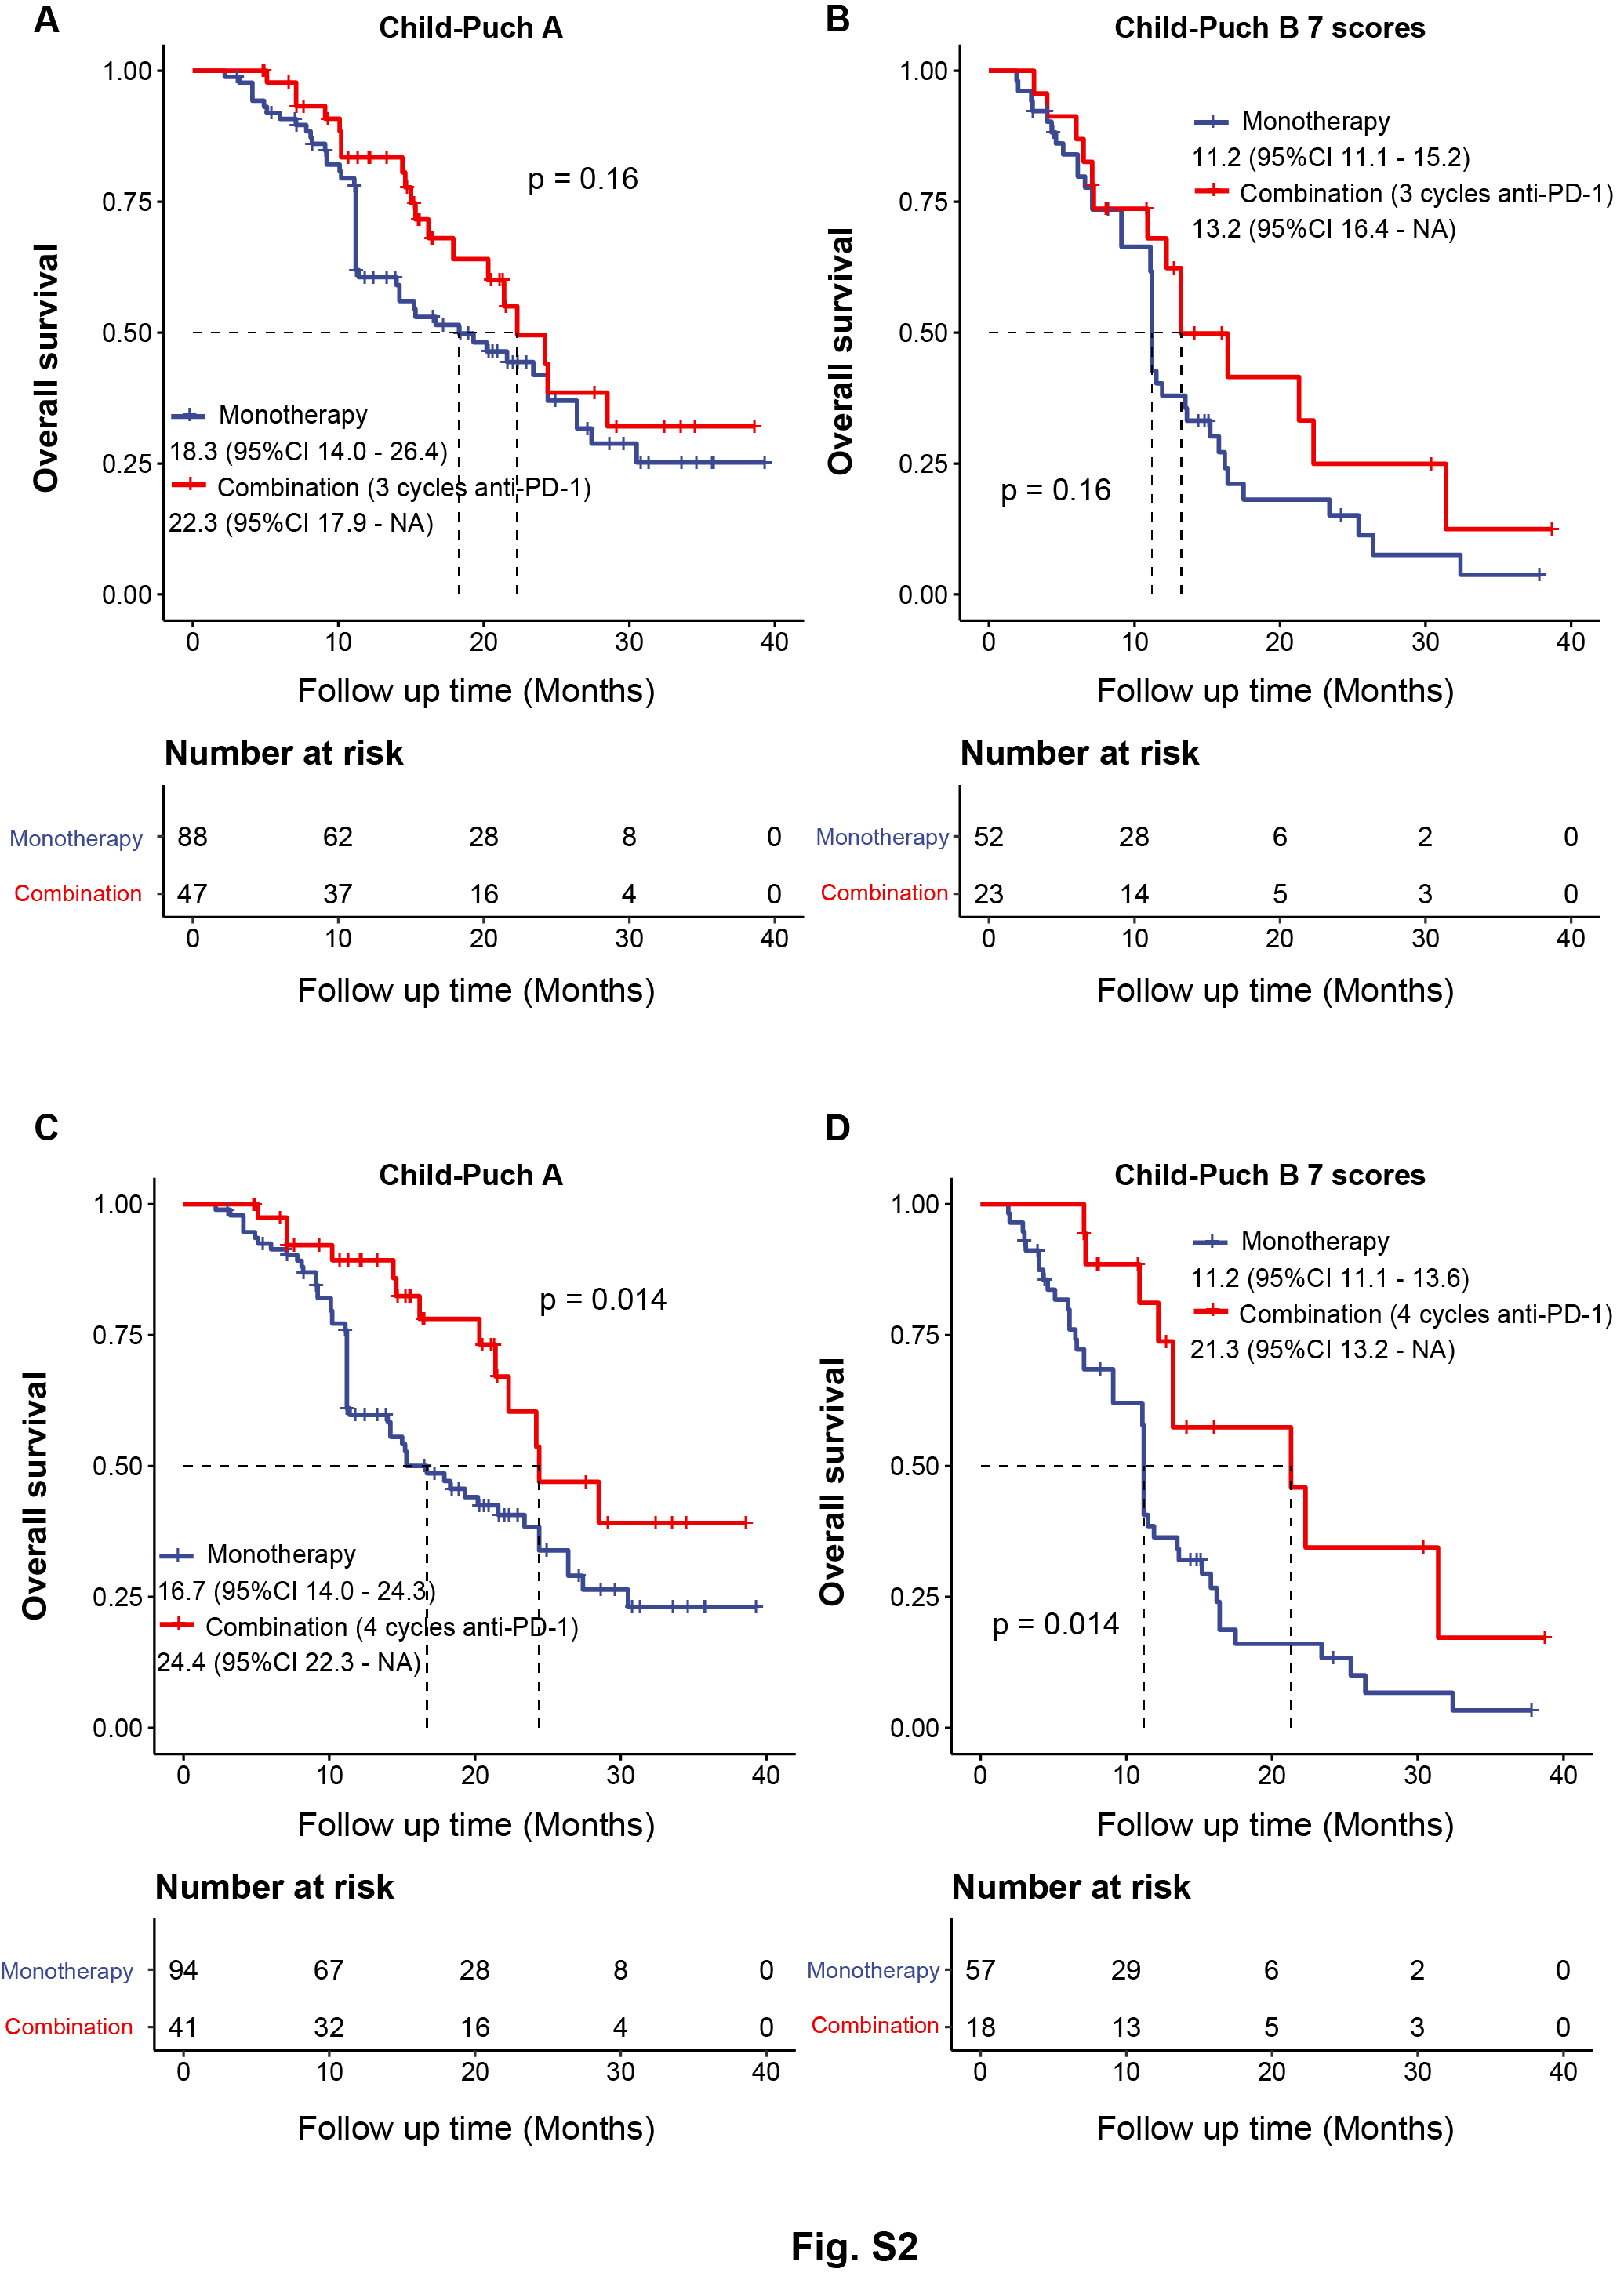


**Figure. S2. Overall survival of the combination therapy and monotherapy groups based on Child-Pugh A and B 7 scores.**
